# Supplementary material
Source: publisher figshare collection journal article supplement (https://plos.figshare.com/articles/dataset/_/118986)
Supplement: Supplementary file [file 1]

**Table S1.** Primers used in this study. Sequences for homologous recombination (HR) in *S. cerevisiae* are indicated by shading. Start and stop codons are underlined.

| Primer                               | Sequence 5'-3'                                                      | Target                                       | Reference  |
|--------------------------------------|---------------------------------------------------------------------|----------------------------------------------|------------|
| <b>Homologous recombination</b>      |                                                                     |                                              |            |
| PREB-HR-Fw                           | CACTAAATTACCGGATCAATTCGGG <u>AT</u> GGCACCCCTCATTCGACCCCTTC         | pCM189 / <i>PREB</i>                         | This study |
| PREB-HR-Rev                          | TCGATGTTAACAGGCCTGTTTAAAC <u>CT</u> AGGCCTTTGTGCCAGCTTC             | pCM189 / <i>PREB</i>                         | This study |
| Pb $\alpha$ -HR-Fw                   | CACTAAATTACCGGATCAATTCGGG <u>AT</u> GAAGTTCGTCGTGGTTTTCTTGC         | pCM189-pCM190 / <i>PB<math>\alpha</math></i> | This study |
| Pb $\alpha$ -HR-Rev                  | TCGATGTTAACAGGCCTGTTTAAAC <u>CT</u> AGCAACCCTGACCAGGGCGAGTG         | pCM189-pCM190 / <i>PB<math>\alpha</math></i> | This study |
| MF $\alpha$ 2-HR-HPH-Fw              | GCTAGTGTTCACTTGCTCATTGATGTCCC <u>G</u> AGAAAGGAAGGGAAGAAAGCGAAAGGAG | MF $\alpha$ 2 flank / HPH                    | This study |
| MF $\alpha$ 2-HR-HPH-Rev             | GGCCAATTATTACTGCTAAAGATAAACTC <u>C</u> CACAGGAAACAGCTATGACCATGATTAC | MF $\alpha$ 2 flank / HPH                    | This study |
| <b>Gene replacement confirmation</b> |                                                                     |                                              |            |
| pCM-Conf-Fw                          | GCATGCATGTGCTCTGTATG                                                | pCM189 / pCM190                              | This study |
| pCM-Conf-Rev                         | TTTCGGTTAGAGCGGATGTG                                                | pCM189 / pCM190                              | This study |
| HPH-Conf-Fw                          | CGCAAGGAATCGGTCAATAC                                                | HPH                                          | This study |
| HPH-Conf-Rev                         | AAAGCATCAGCTCATCGAGA                                                | HPH                                          | This study |
| MF $\alpha$ -Conf-Rev                | GTCCGAAAAATTGAAAGTC                                                 | MF $\alpha$ 2 flank                          | This study |
| <b>Real-time PCR</b>                 |                                                                     |                                              |            |
| MAT11-RT-Fw                          | CATTCAGAAGCTTCTACTCTAC                                              | <i>MAT1-1</i>                                | This study |
| MAT11-RT-Rev                         | CCTTCGCAAGGATTGCCCAC                                                | <i>MAT1-1</i>                                | This study |
| MAT12-RT-Fw                          | AACGACATATCGATACTCCTTG                                              | <i>MAT1-2</i>                                | This study |
| MAT12-RT-Rev                         | GATAGTAAGGGTGATCTTTG                                                | <i>MAT1-2</i>                                | This study |
| Pb $\alpha$ -RT-Fw                   | GTCGTGGTTTTCTTGCAATTG                                               | <i>Pb<math>\alpha</math></i>                 | This study |
| Pb $\alpha$ -RT-Rev                  | TCTCGACGGGCGCATTC                                                   | <i>Pb<math>\alpha</math></i>                 | This study |
| PREB-RT-Fw                           | GTGATCCCAGCCATCTTCTC                                                | <i>PREB</i>                                  | This study |
| PREB-RT-Rev                          | GTAGCCACTGAAGCCCATAG                                                | <i>PREB</i>                                  | This study |
| PREA-RT-Fw                           | TCCCCAAGAAACATCAGTCC                                                | <i>PREA</i>                                  | This study |
| PREA-RT-Rev                          | CATGACCATGCTAGAGGGATG                                               | <i>PREA</i>                                  | This study |

| Primer                      | Sequence 5'-3'         | Target                  | Reference                    |
|-----------------------------|------------------------|-------------------------|------------------------------|
| <b><i>Real-time PCR</i></b> |                        |                         |                              |
| GPA1-RT-Fw                  | ACTGAAGAGGGATAAGATG    | <i>GPA1</i>             | This study                   |
| GPA1-RT-Rev                 | CATAGCCTCGAGAATAAC     | <i>GPA1</i>             | This study                   |
| STE4-RT-Fw                  | CTGGGAAATCAGTACAAAC    | <i>STE4</i>             | This study                   |
| STE4-RT-Rev                 | ACCTTCTCTCCTCTTAGAAC   | <i>STE4</i>             | This study                   |
| STE18-RT-F1                 | CTATCCCACACCATCTAG     | <i>STE18</i>            | This study                   |
| STE18-RT-R1                 | GTACGTTGAGCTCATTTAG    | <i>STE18</i>            | This study                   |
| STE20-RT-F1                 | TGGATATGATAACGAGAC     | <i>STE20</i>            | This study                   |
| STE20-RT-R1                 | TAATATCCACCATAGTCTGC   | <i>STE20</i>            | This study                   |
| STE11-RT-F1                 | CAGCTCACAAATCATCTAC    | <i>STE11</i>            | This study                   |
| STE11-RT-R1                 | CGTATACTATGTAGCCAATC   | <i>STE11</i>            | This study                   |
| STE50-RT-F1                 | GCCAAGAACTATCATCAC     | <i>STE50</i>            | This study                   |
| STE50-RT-R1                 | ACTCTTTAGAATCGTCAGTC   | <i>STE50</i>            | This study                   |
| STE7-RT-F1                  | GCCTATTCTTGATGACTTTG   | <i>STE7</i>             | This study                   |
| STE7-RT-R1                  | GTAGGATTTGCGGTTGTG     | <i>STE7</i>             | This study                   |
| KSS1-RT-F1                  | GACAACTCTGGATTTATGAC   | <i>KSS1</i>             | This study                   |
| KSS1-RT-R1                  | GATAAGGGTAAGTTGGTG     | <i>KSS1</i>             | This study                   |
| STE12-RT-Fw                 | AGAAACCTTCATGCTCTC     | <i>STE12</i>            | This study                   |
| STE12-RT-Rev                | CAACTGGTGCAGATATAAG    | <i>STE12</i>            | This study                   |
| Tub2F                       | AGCCTTGCGTCGGAACATAG   | <i>β-tubulin (TUB2)</i> | Marques <i>et al.</i> , 2004 |
| Tub2R                       | ACCTCCATCCAGGAACTCTTCA | <i>β-tubulin (TUB2)</i> | Marques <i>et al.</i> , 2004 |
