# Supplementary material
Source: publisher figshare collection journal article supplement (https://plos.figshare.com/articles/dataset/_/118986)
Supplement: Supplementary file [file 1]

(A)

| Strains/Plasmids             | Genotype                                                       | Source     |
|------------------------------|----------------------------------------------------------------|------------|
| <i>Strains</i>               |                                                                |            |
| BY4741 $\Delta GPA1$         | <i>MATa GPA1::KanMX4</i>                                       | EUROSCARF  |
| AG $\Delta GPA1 \Delta STE2$ | <i>MATa GPA1::hph; STE2::kanMX4</i>                            | This study |
| AGLPbGpa1                    | <i>MATa GPA1::hph pLPbGpa1</i>                                 | This study |
| AGLPbGpa1PreB                | <i>MATa GPA1::hph pLPbGpa1; STE2::kanMX4 pLPreB</i>            | This Study |
| <i>Plasmids</i>              |                                                                |            |
| pLPbGpa1                     | pCM189::PbGPA1 Ampicillin <sup>R</sup> /Histidine <sup>+</sup> | This study |

(B)

| Mate pair <sup>a</sup>         | % Mating <sup>b</sup> |
|--------------------------------|-----------------------|
| BY4741 X BY4742                | 48.8 $\pm$ 4.53       |
| BY4741 X AGLPb $\alpha$        | Not detected          |
| AGLPreB X BY4742               | Not detected          |
| AGLPreB X AGLPb $\alpha$       | 2.53 $\pm$ 0.87       |
| AGLPbGpa1 X BY4742             | Not detected          |
| AGLPreBPbGpa1 X AGLPb $\alpha$ | 2.92 $\pm$ 0.56       |

<sup>a</sup> Strains as described in (A)

<sup>b</sup> Percentage mating  $\pm$  standard deviation

**Figure S3:** Mating efficiencies of *S. cerevisiae* null mutants heterologously expressing the *Paracoccidioides*  $\alpha$ -pheromone receptor PreB and G-protein PbGpa1. Strains and plasmids used in mating assays (A). Mating efficiencies of mate pairs (B). Mating -assays were performed as described in the Materials and Methods. PbGpa1 on its own is not able to restore mating in a BY4741\_ *GPA1* strain, but the *Paracoccidioides*  $\alpha$ -pheromone receptor PreB and G-protein PbGpa1 collectively restore the mating ability in the corresponding *S. cerevisiae* double mutant.
